# Supplementary material for: The interaction of carbon monoxide with model astrophysical surfaces
Source: Royal Society of Chemistry journal article supplement (doi:10.1039/c3cp54024c), 2013-12-18
Supplement: c3cp54024c.pdf [file c3cp54024c.pdf]

## Supplementary Electronic Material

### S1. Experimental

Additional experiments investigating the interaction of CO with argon, krypton, methane, ethane and dihydrogen sulfide were also performed, and are reported in this additional supplementary material. These interactions have much less (or indeed no) relevance to the interstellar spectroscopy, but are useful in identifying and understanding the trends in the spectroscopic behaviour of CO. Argon (99.999%, BOC), krypton (99.999%, BOC), ethane (99.95%, Messer Griesheim), and dihydrogen sulfide (99.6%, BDH) were used without further purification. Methane was studied using computational methods only. The first cooling stage of the cryostat is inconveniently at the desorption temperature of methane, causing slow desorption following methane deposition, and preventing ultrahigh vacuum from being obtained. The experimental methods used are as described in

section 2 of the main text. The computational methods used are as described in section 3 of the main text, with the exception that the 3-21G basis set was applied to Kr.

### S2. Results

The spectra  $\nu_{\text{CO}}$  band for CO interacting with Ar, Kr,  $\text{C}_2\text{H}_6$  and  $\text{H}_2\text{S}$  surfaces, and sandwiched in within these species, are shown in Fig. S1. Peak positions and widths are summarised in Table S1. The CO interaction with each species is discussed in turn below. The configurations of the stable complexes as determined by the *ab initio* calculations are shown in Figs. S2 – S6, and the energetic, spectroscopic and bond length data corresponding to these complexes are displayed in Table S2. Comparisons of the experimental results with gas phase and matrix isolation experiments from the literature are made in Table S3.

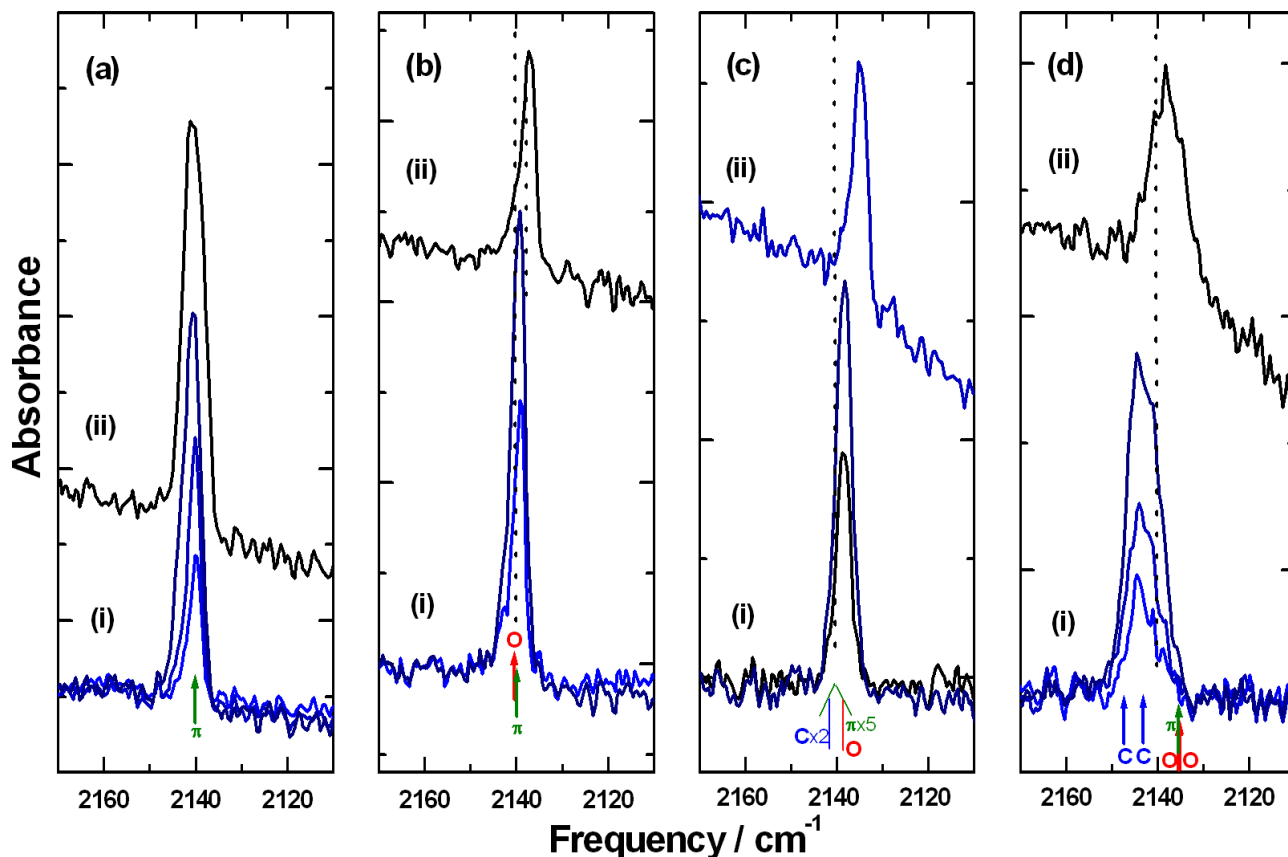

**Fig. S1** RAIR difference spectra of CO adsorbed on (a) argon; (b) krypton; (c),  $\text{C}_2\text{H}_6$  and (d)  $\text{H}_2\text{S}$ ; (i) 0.25 L ((a) and (d) only), 0.50 L and 1.0 L of CO adsorbed at 8 K onto a 50 L film of the second species pre-deposited at 8 K, (ii) 1.0 L CO ((a) and (d)) or 0.5 L CO ((b) and (c)) ‘sandwiched’ at 8 K between 50 L deposits of the second species; spectra of the initially deposited 50 L film have been subtracted in each case. Arrows mark the predicted frequencies of  $\nu_{\text{CO}}$  vibrations of  $\text{C}_{\text{CO}}$ -bonded,  $\text{O}_{\text{CO}}$ -bonded and  $\pi$ -bonded molecules for stable CO complexes in the *ab initio* calculations. The dotted line marks the position of the  $\nu_{\text{CO}}$  vibration for CO adsorbed on an argon surface.

**Table S1**  $\nu_{\text{CO}}$  peak positions and widths for 0.5 L of CO adsorbed on, and 1.0 L CO sandwiched in films of various species.

| Film Species                  | Peak Position {FWHM} / $\text{cm}^{-1}$ | Shift <sup>a</sup> | Sandwich Peak Position {FWHM} / $\text{cm}^{-1}$ | Shift <sup>b</sup> |
|-------------------------------|-----------------------------------------|--------------------|--------------------------------------------------|--------------------|
| Ar                            | 2140.1 {3.2}                            | 0.0                | 2140.4 {6.0}                                     | 0.0                |
| Kr                            | 2139.6 {3.1}                            | -0.5               | 2137.4 {3.7} <sup>c</sup>                        | -3.0               |
| C <sub>2</sub> H <sub>6</sub> | 2138.7 {4.0}                            | -1.4               | 2135.2 {3.8} <sup>c</sup>                        | -5.2               |
| H <sub>2</sub> S              | 2143.4 {5.7}                            | 3.3                | 2138.1 {8.4}                                     | -2.3               |
|                               | ~2140                                   | ~0                 |                                                  |                    |

<sup>a</sup> relative to  $\nu_{\text{CO}}$  for the gas phase Ar/CO at 2140.1  $\text{cm}^{-1}$ .

<sup>b</sup> relative to  $\nu_{\text{CO}}$  for CO sandwiched between argon layers at 2140.4  $\text{cm}^{-1}$ .

<sup>c</sup> data for 0.5 L CO sandwiched.

### S2.1 CO-Ar Interaction

The  $\nu_{\text{CO}}$  peak for the 0.25 L CO exposure on Ar is 2140.1  $\text{cm}^{-1}$ , and is relatively narrow (Fig. S1a(i)). As the coverage increases, the peak broadens slightly, and is shifted to higher frequency by less than 1  $\text{cm}^{-1}$ , reflecting the increase in CO-CO interactions. The  $\nu_{\text{CO}}$  peak in the sandwiched film at 2140.4  $\text{cm}^{-1}$  is slightly broader still (Fig. 1a(ii)).

The CO-Ar complex is well known, and one of the most thoroughly studied van der Waals complexes, both experimentally and theoretically<sup>S1-S6</sup>. Spectroscopic investigations of the gas phase CO-Ar complex in the infrared<sup>S1</sup> and microwave<sup>S2</sup> have established that its geometry is close to 'T' shaped, with the O atom slightly closer to the Ar atom. The origin of the  $\nu_{\text{CO}}$  frequency for the CO-Ar complex has been experimentally observed to be red shifted by 0.44  $\text{cm}^{-1}$  with respect to that of the CO monomer<sup>S4</sup>. In recent years, the computational studies have produced models with consistent results<sup>S3-S6</sup>. The predicted stabilities fall within the 1.2 to 1.3 kJ  $\text{mol}^{-1}$  range, with 'T' shaped geometries tilted toward either the C or O atoms by no more than 5°. Our *ab initio* calculations reproduce this geometry (Fig. S2), and predict a  $\nu_{\text{CO}}$  frequency shift close to that experimentally measured. However, the stability is much lower than previously reported, and in fact after BSSE correction, the predicted complex is unstable. As with the CO dimer, the matrix isolation of CO in argon has been extensively studied, with varying peak positions and assignments given<sup>28,29,69</sup>. Abe *et al.*<sup>69</sup> report two  $\nu_{\text{CO}}$  peaks, at 2138.5  $\text{cm}^{-1}$  and 2136.7  $\text{cm}^{-1}$  attributed to librating and non-librating CO monomers, respectively.

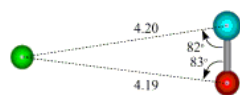

**Fig. S2** Local minimum geometry for the predicted CO-Ar complex. Marked bond distances are in angstroms.

### S2.2 CO-Kr Interaction

The  $\nu_{\text{CO}}$  stretch feature of the CO on Kr system shows a red shift of 0.5  $\text{cm}^{-1}$ , and is somewhat narrower than for CO on other surfaces (Fig. S1b(i)). The peak is red shifted by 3.0  $\text{cm}^{-1}$  in the sandwich experiment, and although broader than for CO adsorbed on the Kr surface, it remains much narrower than for the sandwich experiments for other systems (Fig. S1b(ii)).

The gas phase CO-Kr complex has been studied experimentally in supersonic free jet expansions using infrared<sup>S7,S8</sup>, microwave<sup>S9</sup> and millimetre wave<sup>S10</sup> spectroscopy. The origin of the  $\nu_{\text{CO}}$  band is shifted by 0.63  $\text{cm}^{-1}$  with respect to the CO monomer<sup>S8</sup>, and a 'T' shaped structure determined<sup>S9</sup>. *Ab initio* computational studies of the CO-Kr complex using coupled-cluster theory have found it to be stabilised by 1.43 kJ  $\text{mol}^{-1}$ , and to have a 'T' shaped structure with the CO...Kr bond tilted by roughly 9° with the C atom closer to the Kr atom<sup>S11,S12</sup>. Our *ab initio* calculations produced a slightly more tilted geometry (Fig. S3(i)), in addition to a linear C-bonded complex (Fig. S3(ii)). Again, the predicted stabilities of these complexes are much lower than the previously calculated value, and become negative after BSSE correction, although the  $\nu_{\text{CO}}$  frequency shift of the 'T' shaped structure reproduces the experimental observation well. The infrared spectrum of CO isolated in krypton matrix has also been previously studied<sup>S13,S14</sup>. As in argon, peaks for librating and non-librating CO molecules were identified, with red shifts of 2.8 and 3.8  $\text{cm}^{-1}$ , respectively<sup>S14</sup>.

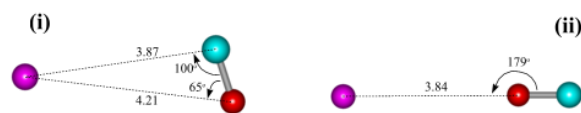

**Fig. S3** Local minimum geometry for the predicted CO-Kr complexes. Marked bond distances are in angstroms.

### S2.3 CO-C<sub>2</sub>H<sub>6</sub> Interaction

The RAIR spectrum of the 50 L initially deposited C<sub>2</sub>H<sub>6</sub> film (not shown) is in reasonable agreement with previously published IR spectra<sup>S15</sup>. It is consistent with the formation of an amorphous film, as is expected from previous IR and Raman studies<sup>S16,S17</sup>. The  $\nu_{\text{CO}}$  band for CO adsorbed on C<sub>2</sub>H<sub>6</sub> is red shifted by 1.4  $\text{cm}^{-1}$  (Fig. S1c(i)). A more substantial red shift of 5.2  $\text{cm}^{-1}$  is observed for CO sandwiched in C<sub>2</sub>H<sub>6</sub>, although the peak is slightly less broad than that of CO adsorbed on the C<sub>2</sub>H<sub>6</sub> surface.

Eight weakly bound complexes were identified in our *ab initio* calculations (Fig. S4(i)-(viii)), although following vibrational analysis, five of these structures appear to be saddle point geometries. A linear O=C...H-CH<sub>2</sub>CH<sub>3</sub> complex (Fig. S4(i)) is the most stable of the complexes, although following BSSE correction this, and all seven other, structures were found to have negative binding energy.

We have not located any publications that study the CO-C<sub>2</sub>H<sub>6</sub> complex, either experimentally or theoretically. Furthermore, we know of no infrared studies of co-deposited CO and ethane in the literature. However, Schriver *et al.* report the frequency of the  $\nu_{\text{CO}}$  band for CO reactively formed by UV photolysis of CO<sub>2</sub>-C<sub>2</sub>H<sub>6</sub> mixtures to be 2140 cm<sup>-1</sup> S15, although this region of the spectrum is not shown in detail and the precision of this frequency is not known.

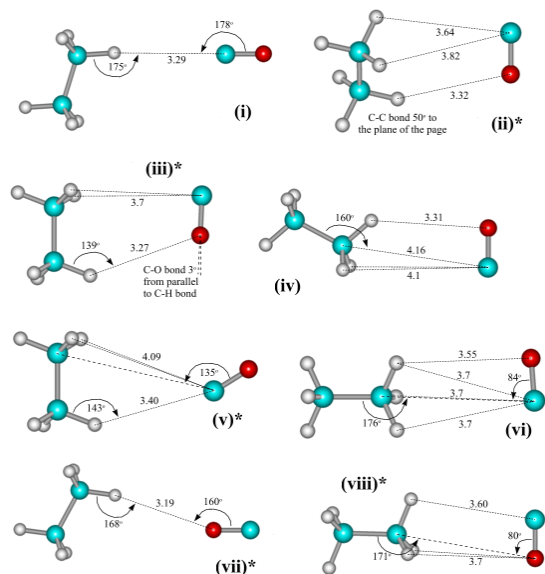

**Fig. S4** Local minimum geometry for the predicted CO-C<sub>2</sub>H<sub>6</sub> complexes. Marked bond distances are in angstroms. Complexes found to be saddle point geometries based on vibrational analysis are marked \*.

## S2.4 CO-CH<sub>4</sub> Interaction

Given the lack of published data with which to compare the RAIR spectra and *ab initio* calculations for the CO-C<sub>2</sub>H<sub>6</sub> system, it is worth considering previous studies of the interaction between CO and methane. We were not able to study this system experimentally – the temperature of the heat shield on our cryostat coincides with the desorption temperature of methane, meaning that UHV can not be attained after deposition of methane. Studies of the gas phase CO-CH<sub>4</sub> complex have demonstrated that the origin of the  $\nu_{\text{CO}}$  band is red shifted by 0.63 cm<sup>-1</sup> with respect to the CO monomer S18, and that its geometry to be essentially ‘T’ shaped S19. To our knowledge, the CO-CH<sub>4</sub> complex has not been studied within the matrix of a rare gas, however, the infrared spectrum of CO within a CH<sub>4</sub> matrix has been recorded S20. A  $\nu_{\text{CO}}$  peak lies at about the frequency expected for matrix isolated CO. Two additional peaks with significant blue and red shifts were observed, although no interpretation of the spectra was offered. A red shifted  $\nu_{\text{CO}}$  peak was also observed in an equimolar co-deposition of CO and CH<sub>4</sub> S21. This was supported by *ab initio* calculations of the gas phase CO-CH<sub>4</sub> complex at second order Møller-Plesset perturbation level of theory (MP2), which found two nearly isoenergetic structures, with tilted linear O=C··H-CH<sub>3</sub> and C=O··H-CH<sub>3</sub> geometries and high stabilities of around 14 kJ mol<sup>-1</sup>. Both structures were found to have substantially red shifted  $\nu_{\text{CO}}$  frequencies.

Our *ab initio* calculations found three weakly bound structures:

a linear O=C··H-CH<sub>3</sub> complex, a linear C=O··H-CH<sub>3</sub> complex and a tilted ‘T’-shaped complex which is similar to the experimentally determined geometry of the gas phase complex (Figs. S5(i)-(iii)). However, the latter two structures were found to be saddle point geometries. Only the linear C=O··H-CH<sub>3</sub> complex was stable following BSSE correction. The predicted  $\nu_{\text{CO}}$  frequencies showed a slight blue shift for the linear O=C··H-CH<sub>3</sub> complex and slight red shifts for the tilted ‘T’-shaped and linear C=O··H-CH<sub>3</sub> complexes.

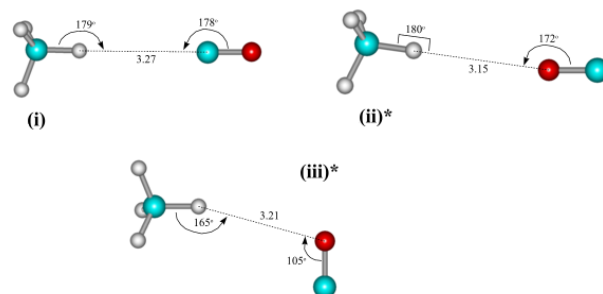

**Fig. S5** Local minimum geometry for the predicted CO-CH<sub>4</sub> complexes. Marked bond distances are in angstroms. Complexes found to be saddle point geometries based on vibrational analysis are marked \*.

## S2.5 CO-H<sub>2</sub>S Interaction

The RAIR spectrum obtained for the initially deposited H<sub>2</sub>S film (not shown) displayed good agreement with the bands identified in a previously published transmission IR study S22, and confirms that the deposited film adopted an amorphous structure, rather than any of the three crystalline structures previously identified S23,S24. For a 0.25 L exposure of CO on H<sub>2</sub>S the  $\nu_{\text{CO}}$  band is centred with a blue shift of 3.3 cm<sup>-1</sup>, although it is non-symmetrical and the peak maximum is a further 0.7 cm higher in frequency (Fig. 1d(i)). As the CO exposure is increased to 1.0 L, the peak broadens and the asymmetry increases, giving the strong suggestion of a second contribution to the peak at a red shift of roughly 1 cm<sup>-1</sup>. The  $\nu_{\text{CO}}$  band for CO sandwiched between H<sub>2</sub>S films shows a 2.0 cm<sup>-1</sup> red shift (Fig. 1d(ii)).

Infrared spectroscopy of the gas phase CO-H<sub>2</sub>S complex has measured the origin of the  $\nu_{\text{CO}}$  band to be blue shifted by 3.8 cm<sup>-1</sup> with respect to the CO monomer S25, although no geometry has been reported. Computational studies of the complex using MM S26 and MP2 *ab initio* S27 methods found the same two stable geometries, both linearly aligned with the S-H bond, and interacting via either the C or O atom. However, the HS-H··OC complex was found to be the global minimum geometry with a stability of 3.67 kJ mol<sup>-1</sup> in the MM study S26, whereas in the MP2 study, the HS-H··CO complex was substantially more stable, with a stability of 5.22 kJ mol<sup>-1</sup> S26. The shifts in the  $\nu_{\text{CO}}$  frequency were also calculated in the MP2 study, with a red shift of 2.7 cm<sup>-1</sup> predicted for the C=O··H-SH complex and a larger blue shift of 5.2 cm<sup>-1</sup> predicted for the O=C··H-SH complex S27. These were compared to observed vibrational features for the CO-H<sub>2</sub>S complex formed by photolytic decomposition of monothioformic acid in an argon matrix S27. A broad feature centred at 2143 cm<sup>-1</sup> was attributed to the CO-H<sub>2</sub>S complex, although the authors speculated that interconversion between various geometries may induce the breadth of the peak, since the barrier to conversion has been calculated to be very low S26.

Our *ab initio* calculations identified five stable geometries for the isomer, all of which were planar. The linear  $\text{O}=\text{C}\cdots\text{H}-\text{SH}$  complex (Fig. S6(i)) was the most stable after geometry optimisation, but following BSSE correction the linear  $\text{C}\equiv\text{O}\cdots\text{H}-\text{SH}$  complex (Fig. S6(ii)) was found to be the global minimum, with a stability of  $1.29 \text{ kJ mol}^{-1}$ . The latter was also the most frequently obtained geometry. The other geometries were a tilted compact structure with a  $\text{H}\cdots\text{O}$  interaction (Fig. S6(iii)), a  $\text{H}\cdots\text{C}$  ‘elbow’ complex (Fig. S6(iv)) and a bifurcated  $\text{H}_2\cdots\text{O}$  ‘arrow’ complex (Fig. S6(v)) in which the  $\text{O}=\text{C}$  bond points at the S atom from between the two hydrogen atoms, although vibrational analysis suggests that this fifth complex is a saddle point geometry. The predicted  $\nu_{\text{CO}}$  frequencies were blue shifted from that of the CO monomer by  $6.93 \text{ cm}^{-1}$  and  $2.82 \text{ cm}^{-1}$  for the linear  $\text{O}=\text{C}\cdots\text{H}-\text{SH}$  and  $\text{C}\cdots\text{H}$  ‘elbow’ complexes, respectively, and red shifted by  $5.69 \text{ cm}^{-1}$ ,  $5.46 \text{ cm}^{-1}$  and  $5.24 \text{ cm}^{-1}$  for the linear  $\text{C}\equiv\text{O}\cdots\text{H}-\text{SH}$ , compact  $\text{O}=\text{C}\parallel\text{H}-\text{SH}$  and ‘arrow’ complexes, respectively.

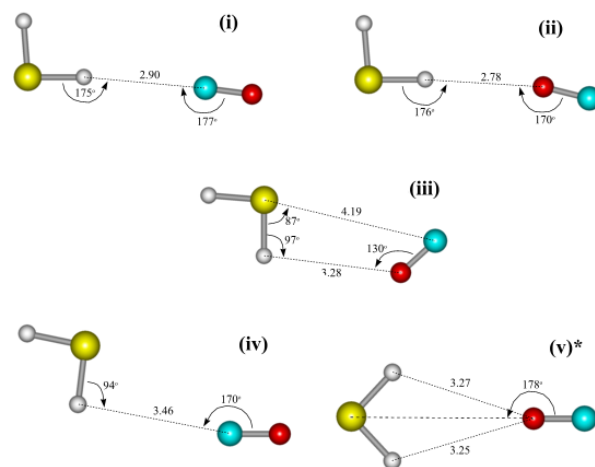

**Fig. S6** Local minimum geometry for the predicted  $\text{H}_2\text{S}\cdots\text{CO}$  complexes. Marked bond distances are in angstroms. Complexes found to be saddle point geometries based on vibrational analysis are marked \*.

**Table S2.** A summary of results of *ab initio* calculations for complexes of CO with various species.

| Complex                                                                                                                                                                                                                                                                                                                                                                                                                                                                                                                                                                                                                                                                                    | CO Bonding Configuration                                                                                                | Starting Geometries Optimised <sup>a</sup>        | Uncorrected Stability / $\text{kJ mol}^{-1}$                         | Corrected Stability / $\text{kJ mol}^{-1}$                                   | $\text{C}\equiv\text{O}$ Bond Length / Å                                             | Corrected (Surface) $\nu_{\text{CO}} / \text{cm}^{-1b}$                      | Corrected (Gas Phase) $\nu_{\text{CO}} / \text{cm}^{-1c}$                            |
|--------------------------------------------------------------------------------------------------------------------------------------------------------------------------------------------------------------------------------------------------------------------------------------------------------------------------------------------------------------------------------------------------------------------------------------------------------------------------------------------------------------------------------------------------------------------------------------------------------------------------------------------------------------------------------------------|-------------------------------------------------------------------------------------------------------------------------|---------------------------------------------------|----------------------------------------------------------------------|------------------------------------------------------------------------------|--------------------------------------------------------------------------------------|------------------------------------------------------------------------------|--------------------------------------------------------------------------------------|
| <b>CO monomer</b>                                                                                                                                                                                                                                                                                                                                                                                                                                                                                                                                                                                                                                                                          |                                                                                                                         | <b>1</b>                                          | -----                                                                | -----                                                                        | 1.11365                                                                              | -----                                                                        | 2143.27                                                                              |
| <b>CO-Ar</b> Fig. S2<br>'T' shaped                                                                                                                                                                                                                                                                                                                                                                                                                                                                                                                                                                                                                                                         | $\pi$                                                                                                                   | 3<br>1                                            | 0.132                                                                | -0.170                                                                       | 1.11367                                                                              | 2140.1                                                                       | 2142.75                                                                              |
| <b>CO-Kr</b> Fig. S3<br>'T'-shaped; (i)<br>$\text{C}\equiv\text{O}\cdots\text{Kr}$ linear; (ii)                                                                                                                                                                                                                                                                                                                                                                                                                                                                                                                                                                                            | $\pi$<br>$\text{O}_{\text{CO}}$                                                                                         | <b>3</b><br>1<br>1                                | 0.822<br>0.532                                                       | -0.783<br>-0.759                                                             | 1.11367<br>1.11364                                                                   | 2140.0<br>2140.5                                                             | 2142.70<br>2143.16                                                                   |
| <b>CO-C<sub>2</sub>H<sub>6</sub></b> Fig. S4<br>$\text{O}=\text{C}\cdots\text{H}-\text{CH}_2\text{CH}_3$ linear; (i)<br>$\text{H}_2\cdots\text{C}\equiv\text{O}\cdots\text{H}$ bridged; (ii)*<br>$\text{C}\equiv\text{O}\parallel\text{H}_3\text{C}-\text{CH}_3$ parallel; (iii)*<br>$\text{O}=\text{C}\parallel\text{H}-\text{CH}_2\text{CH}_3$ planar; (iv)<br>$\text{O}=\text{C}-\text{H}_3\text{C}-\text{CH}_3$ 'T'-shaped; (v)*<br>$\text{O}=\text{C}\parallel\text{H}-\text{CH}_2\text{CH}_3$ non-planar; (vi)<br>$\text{C}\equiv\text{O}\cdots\text{H}-\text{CH}_2\text{CH}_3$ linear; (vii)*<br>$\text{C}\equiv\text{O}\parallel\text{H}-\text{CH}_2\text{CH}_3$ parallel; (viii)* | $\text{C}_{\text{CO}}$<br>$\pi$<br>$\pi$<br>$\pi$<br>$\text{C}_{\text{CO}}$<br>$\pi$<br>$\text{O}_{\text{CO}}$<br>$\pi$ | <b>12</b><br>1<br>4<br>1<br>1<br>1<br>2<br>1<br>1 | 0.834<br>0.767<br>0.765<br>0.680<br>0.652<br>0.604<br>0.521<br>0.515 | -0.282<br>-0.317<br>-0.278<br>-0.192<br>-0.298<br>-0.201<br>-0.061<br>-0.207 | 1.11350<br>1.11382<br>1.11381<br>1.11356<br>1.11356<br>1.11372<br>1.11373<br>1.11365 | 2141.7<br>2139.7<br>2138.6<br>2139.5<br>2140.7<br>2139.7<br>2140.1<br>2140.2 | 2144.38<br>2142.31<br>2141.28<br>2142.17<br>2143.39<br>2142.35<br>2142.78<br>2142.30 |
| <b>CO-CH<sub>4</sub></b> Fig. S5<br>$\text{O}=\text{C}\cdots\text{H}-\text{CH}_3$ linear; (i)<br>$\text{C}\equiv\text{O}\cdots\text{H}-\text{CH}_3$ linear; (ii)*<br>$\text{CO}\mid\text{H}-\text{CH}_3$ 'T'-shaped; (iii)*                                                                                                                                                                                                                                                                                                                                                                                                                                                                | $\text{C}_{\text{CO}}$<br>$\text{O}_{\text{CO}}$<br>$\pi$                                                               | <b>10</b><br>3<br>1<br>5                          | 0.918<br>0.606<br>0.691                                              | -0.200<br>0.005<br>-0.159                                                    | 1.11348<br>1.11373<br>1.11385                                                        | 2142.0<br>2139.4<br>2138.9                                                   | 2144.66<br>2141.07<br>2142.55                                                        |
| <b>CO-H<sub>2</sub>S</b> Fig. S6<br>$\text{O}=\text{C}\cdots\text{H}-\text{SH}$ linear; (i)<br>$\text{C}\equiv\text{O}\cdots\text{H}-\text{SH}$ linear; (ii)<br>$\text{O}=\text{C}\parallel\text{H}-\text{SH}$ compact; (iii)<br>$\text{O}=\text{C}\cdots\text{H}-\text{SH}$ elbow; (iv)<br>$\text{C}\equiv\text{O}\cdots\text{H}_2\text{S}$ arrow; (v)*                                                                                                                                                                                                                                                                                                                                   | $\text{C}_{\text{CO}}$<br>$\text{O}_{\text{CO}}$<br>$\pi$<br>$\text{C}_{\text{CO}}$<br>$\text{O}_{\text{CO}}$           | <b>20</b><br>3<br>9<br>5<br>1<br>2                | 2.423<br>2.057<br>2.043<br>2.034<br>1.647                            | 0.744<br>1.292<br>0.926<br>0.709<br>1.101                                    | 1.11279<br>1.11427<br>1.11427<br>1.11327<br>1.11425                                  | 2147.5<br>2134.9<br>2135.2<br>2143.4<br>2135.4                               | 2150.20<br>2137.58<br>2137.81<br>2146.09<br>2138.03                                  |

\* saddle point geometries.

<sup>a</sup> Where the sum of the optimisations for individual complexes does not equal the total number of optimisations for that system then some starting geometries optimise to a non-bonding configuration.

<sup>b</sup> raw frequencies are scaled by a factor of 0.87666.

<sup>c</sup> raw frequencies are scaled by a factor of 0.87776.

**Table S3** A summary of the shifts in  $\nu_{\text{CO}}$  due to interaction of CO with other species for gas phase complexes, matrix isolated complexes and surface adsorption.

| Interaction                      | Gas Phase <sup>a</sup> | Matrix Isolation <sup>b</sup> | Surface Adsorption <sup>c</sup> |
|----------------------------------|------------------------|-------------------------------|---------------------------------|
| CO-Ar                            | 0                      | 0, -1.8 <sup>d, 69</sup>      | 0                               |
| CO-Kr                            | -0.19 <sup>S8</sup>    | -2.8, -3.8 <sup>e, S14</sup>  | -0.7                            |
| CO-C <sub>2</sub> H <sub>6</sub> | -----                  | 1.5 <sup>f, S15</sup>         | -----                           |
| CO-CH <sub>4</sub>               | -0.19 <sup>S18</sup>   | 6.0, -2.9 <sup>g, S20</sup>   | -0.8                            |
| CO-H <sub>2</sub> S              | 4.2 <sup>S25</sup>     | 4.5 <sup>S27</sup>            | 3.3, ~0                         |

<sup>a</sup> relative to  $\nu_{\text{CO}}$  for the gas phase CO-Ar complex at 2142.83 cm<sup>-1</sup> <sup>54</sup>.

<sup>b</sup> value for the CO complex in an argon matrix relative to  $\nu_{\text{CO}}$  for a librating CO monomer in an argon matrix at 2138.5 cm<sup>-1</sup> <sup>69</sup>.

<sup>c</sup> relative to  $\nu_{\text{CO}}$  of CO on an argon film at 2140.6 cm<sup>-1</sup>; this work.

<sup>d</sup> values for the librating and non-librating CO monomers, respectively.

<sup>e</sup> values for the librating and non-librating CO monomers, respectively, in a krypton matrix.

<sup>f</sup> value for CO in an ethane matrix.

<sup>g</sup> values for CO in a methane matrix.

### S3. Discussion

The five additional systems analysed in this supplementary material provide broad support for the conclusions of the main paper (and indeed were part of the data set used to reach these conclusions). The interactions of CO with the Ar, Kr, and C<sub>2</sub>H<sub>6</sub> and CH<sub>4</sub>, are very weak, and the shifts in  $\nu_{\text{CO}}$  frequency, both experimentally measured and computationally predicted, are small, and thus it is difficult to make any specific comments about the interactions in these systems. The interactions predicted for the CO-H<sub>2</sub>S complexes are stronger, and the shifts in  $\nu_{\text{CO}}$  frequency are more significant. The moderately blue shifted  $\nu_{\text{CO}}$  frequency of the gas phase CO-H<sub>2</sub>S complex is consistent with a C<sub>CO</sub>-hydrogen bonded complex, although the geometry was not determined <sup>S25</sup>. There is computational support for such a complex from both our own and previously published studies, although this geometry is not clearly favoured over the O<sub>CO</sub>-hydrogen bonded complex. Matrix isolation data also supports a C<sub>CO</sub>-bonded complex, although allows for multiple configurations. For CO adsorbed on the H<sub>2</sub>S surface, the observation of a blue shifted peak consistent with CO molecules bonded *via* the C<sub>CO</sub> atom, with  $\pi$  interacting molecules contributing to a possible unshifted component. In contrast to other systems showing a blue shifted surface adsorption, the shift is less than that in the gas phase complex. This may reflect the weaker hydrogen bonding interactions in the H<sub>2</sub>S film in comparison amorphous H<sub>2</sub>O.

### Supplementary References

- S1 A. R. W. McKellar, Y. P. Zeng, S. W. Sharpe, C. Wittig, R. A. Beaudet, *J. Mol. Spectrosc.*, 1992, **153**, 475.  
 S2 T. Ogata, W. Jäger, I. Ozier, M. C. L. Gerry, *J. Chem. Phys.*, 1993, **98**, 9399.  
 S3 R. R. Toczyłowski, S. M. Cybulski, *J. Chem. Phys.*, 2000, **112**, 4604, and references therein.  
 S4 F. A. Gianturco, F. Paesani, *J. Chem. Phys.*, 2001, **115**, 249.  
 S5 T. B. Pedersen, J. L. Cacheiro, B. Fernandez, H. Koch, *J. Chem. Phys.*, 2002, **117**, 6562.

- S6 L. H. Coudert, I. Pak, L. Surin, *J. Chem. Phys.*, 2004, **121**, 4691, and references therein.  
 S7 M. D. Brookes, A. R. W. Walker, *Mol. Phys.*, 1999, **97**, 127.  
 S8 A. R. W. McKellar, *J. Mol. Spectrosc.*, 1993, **158**, 100.  
 S9 K. A. Walker, T. Ogata, W. Jäger, M. C. L. Gerry, I. Ozier, *J. Chem. Phys.*, 1997, **106**, 7519.  
 S10 K. A. Walker, A. R. W. Walker, *J. Mol. Spectrosc.*, 2001, **205**, 331.  
 S11 E. Feng, Z. Wang, M. Gong, Z. Chi, *J. Chem. Phys.*, 2007, **127**, 174301.  
 S12 Z. Wang, M. Gong, Y. Zhang, E. Feng, Z. Cui, *Chem. Phys. Lett.*, 2008, **458**, 7.  
 S13 H. Dubost, *Chem. Phys.*, 1976, **12**, 139.  
 S14 H. Abe, K. M. T. Yamada, *Struct. Chem.*, 2003, **14**, 211.  
 S15 A. Schriver, L. Schriver-Mazzuoli, P. Ehrenfreund, L. d'Hendecourt, *Chem. Phys.*, 2007, **334**, 128.  
 S16 M. G. Wisnosky, D. F. Eggers, L. R. Fredrickson, J. C. Decius, *J. Chem. Phys.*, 1983, **79**, 3505.  
 S17 M. G. Wisnosky, D. F. Eggers, L. R. Fredrickson, J. C. Decius, *J. Chem. Phys.*, 1983, **79**, 3513.  
 S18 C. Xia, K. A. Walker, A. R. W. Walker, *J. Chem. Phys.*, 2001, **114**, 4824.  
 S19 Y. Liu, W. Jäger, *J. Chem. Phys.*, 2004, **121**, 6240.  
 S20 A. G. Maki, *J. Chem. Phys.*, 1961, **35**, 931.  
 S21 W. Z. Alsindi, D. O. Gardner, E. F. van Disheock, H. J. Fraser, *Chem. Phys. Lett.*, 2003, **378**, 178.  
 S22 K. Fathe, J. S. Holt, S. P. Oxley, C. J. Pursell, *J. Phys. Chem. A* 110, (2006) 10793.  
 S23 F. P. Reding, D. F. Hornig, *J. Chem. Phys.*, 1957, **27**, 1024.  
 S24 W. Zheng, R. I. Kaiser, *Chem. Phys. Lett.*, 2007, **440**, 229.  
 S25 C. Xia, A. R. W. McKellar, *J. Molec. Spec.*, 2005, **229**, 39.  
 S26 G. de Oliveira, C. E. Dykstra, *J. Mol. Struct.: THEOCHEM*, 1996, **362**, 235.  
 S27 J. Lundell, E. Nordquist, M. Räsänen, *J. Molec. Struct.*, 1997, **416**, 235.
